# Supplementary material for: Dendritic metalloporphyrins with a distal H-bond donor as mimics of haemoglobinElectronic supplementary information (ESI) available: procedures for the synthesis of 1 and 5 and iron(ii) insertion into the dendritic porphyrins including full spectral characterisation and complete EPR characterisation of the complex 22·Co(dmim) and the corresponding oxygenated complex. See http://www.rsc.org/suppdata/ob/b2/b212468h/
Source: Royal Society of Chemistry journal article supplement (doi:10.1039/b212468h), 2003-03-12
Supplement: b212468h.doc [file b212468h.doc]

Supplementary Material for Organic & Biomolecular Chemistry

This journal is © The Royal Society of Chemistry 2003

# Supplementary data

Electronic Supplementary Information: Dendritic metalloporphyrins with a distal H-bond donor as mimics of haemoglobin

Beatrice Felber*a*, Carlos Calle*b*, Paul Seiler*a*, Arthur Schweiger*b* and François Diederich*a*

a Laboratorium für Organische Chemie, ETH-Hönggerberg, HCI, CH-8093 Zürich, Switzerland.

b Laboratorium für Physikalische Chemie, ETH-Hönggerberg, HCI, CH-8093 Zürich, Switzerland.

General procedure for iron(II) insertion into the free-base porphyrins 22**.**2H - 27**.**2H:

The entire preparation, work-up and characterization of the FeII-porphyrins was done under N2 and rigorous exclusion of air. 10 mg dendritic porphyrin were dissolved in 1 ml THF under N**2** and FeBr**2** (7.5 eq.) and 10 l 2,6-lutidine were added. The solution was stirred at r.t. for 2-7 days. After evaporation of the solvent, the resulting red oil was purified by column chromatography on alumina (solvent gradient THF/MeOH 9:1  5:3) and provided the pure iron(II) porphyrin.

Typical UV/Vis-spectra of the dendritic iron(II) porphyrins of first dendritic generation before and after addition of 300 eq. dmim:


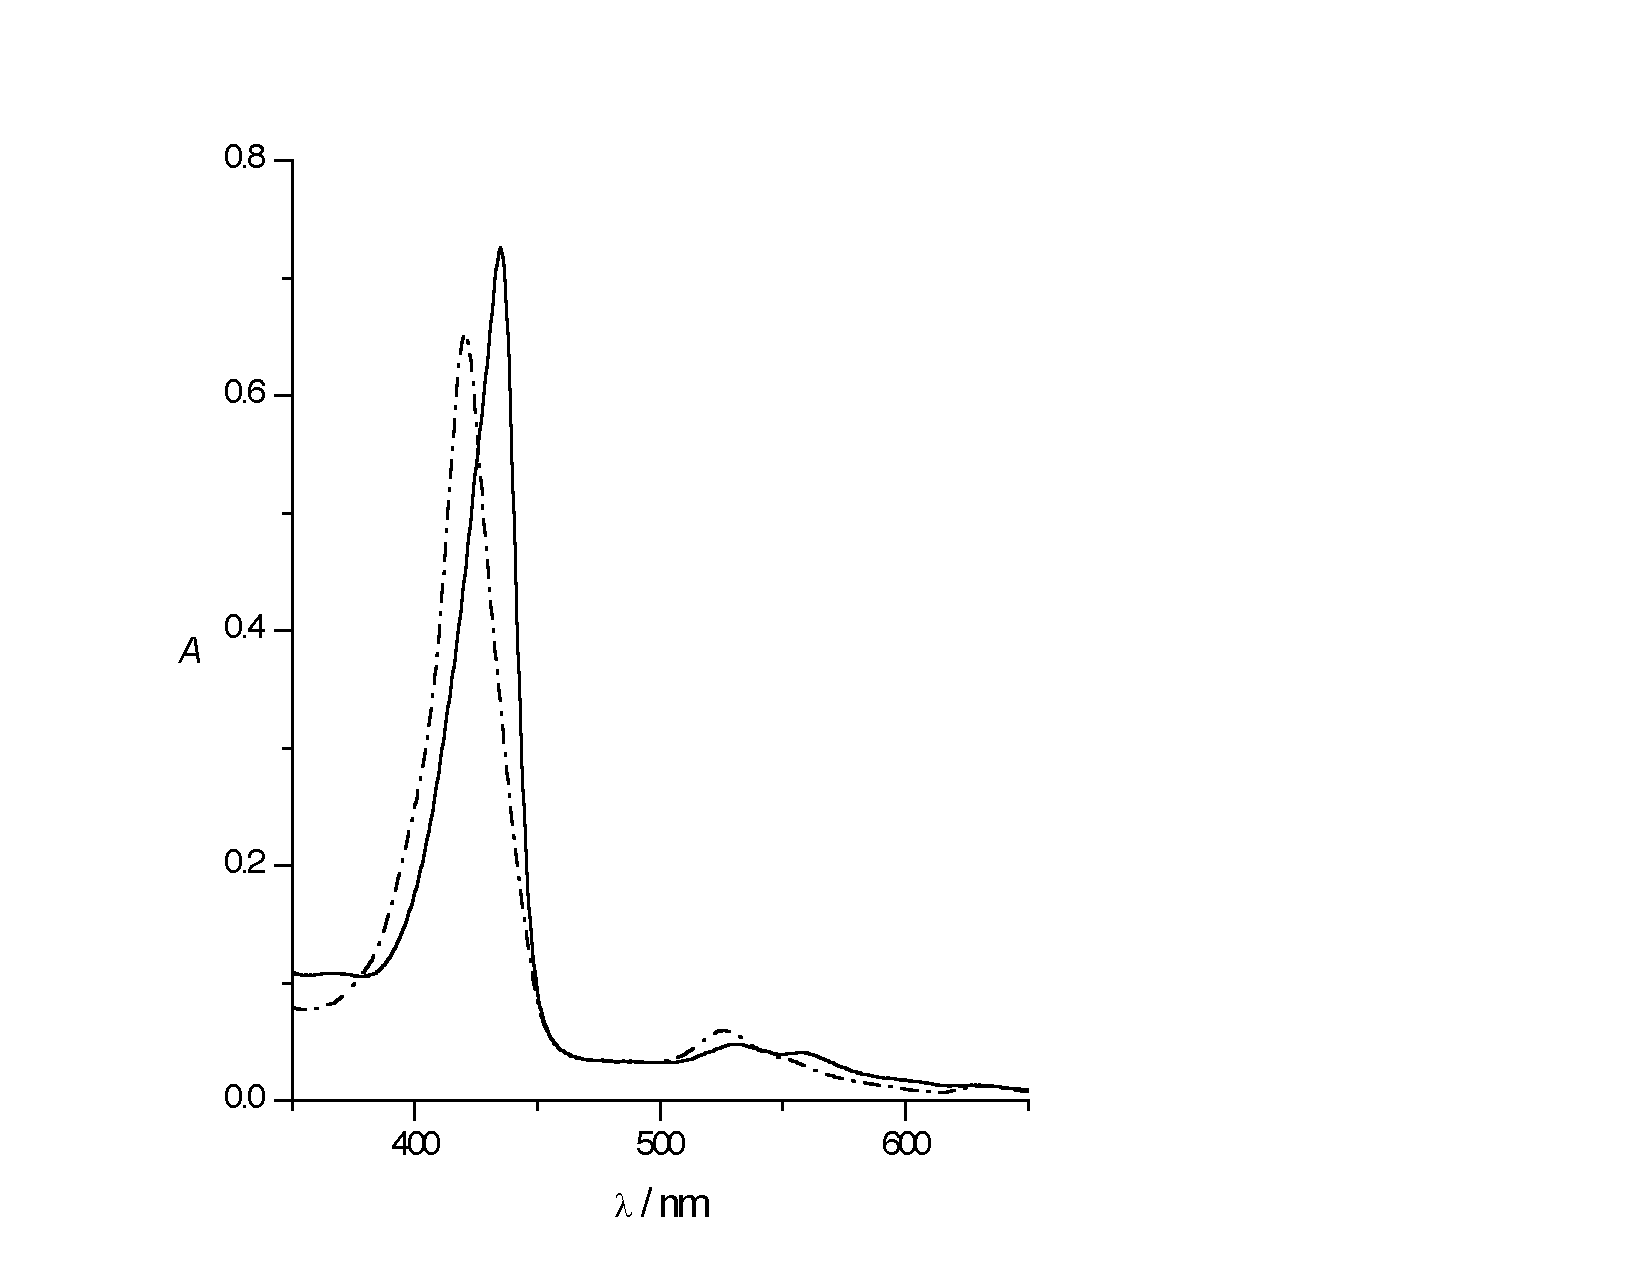


Fig.: The *Soret*-band of the iron(II) porphyrin 25.Fe(dmim) shifts from 420 nm (- . - .) to 435 nm () upon addition of 300 eq. dmim.

Characterisations of compounds 5 and 1:

(*SP*-4-2)-{5,15-Bis[2,6-bis(4-ethoxy-4-oxobutoxy)phenyl]-10-(4,4,5,5-tetramethyl-1,3,2-dioxaborolan-2-yl)porphyrinato(2–)-*N***21**,*N***22**,*N***23**,*N***24**}zinc(II) (5).


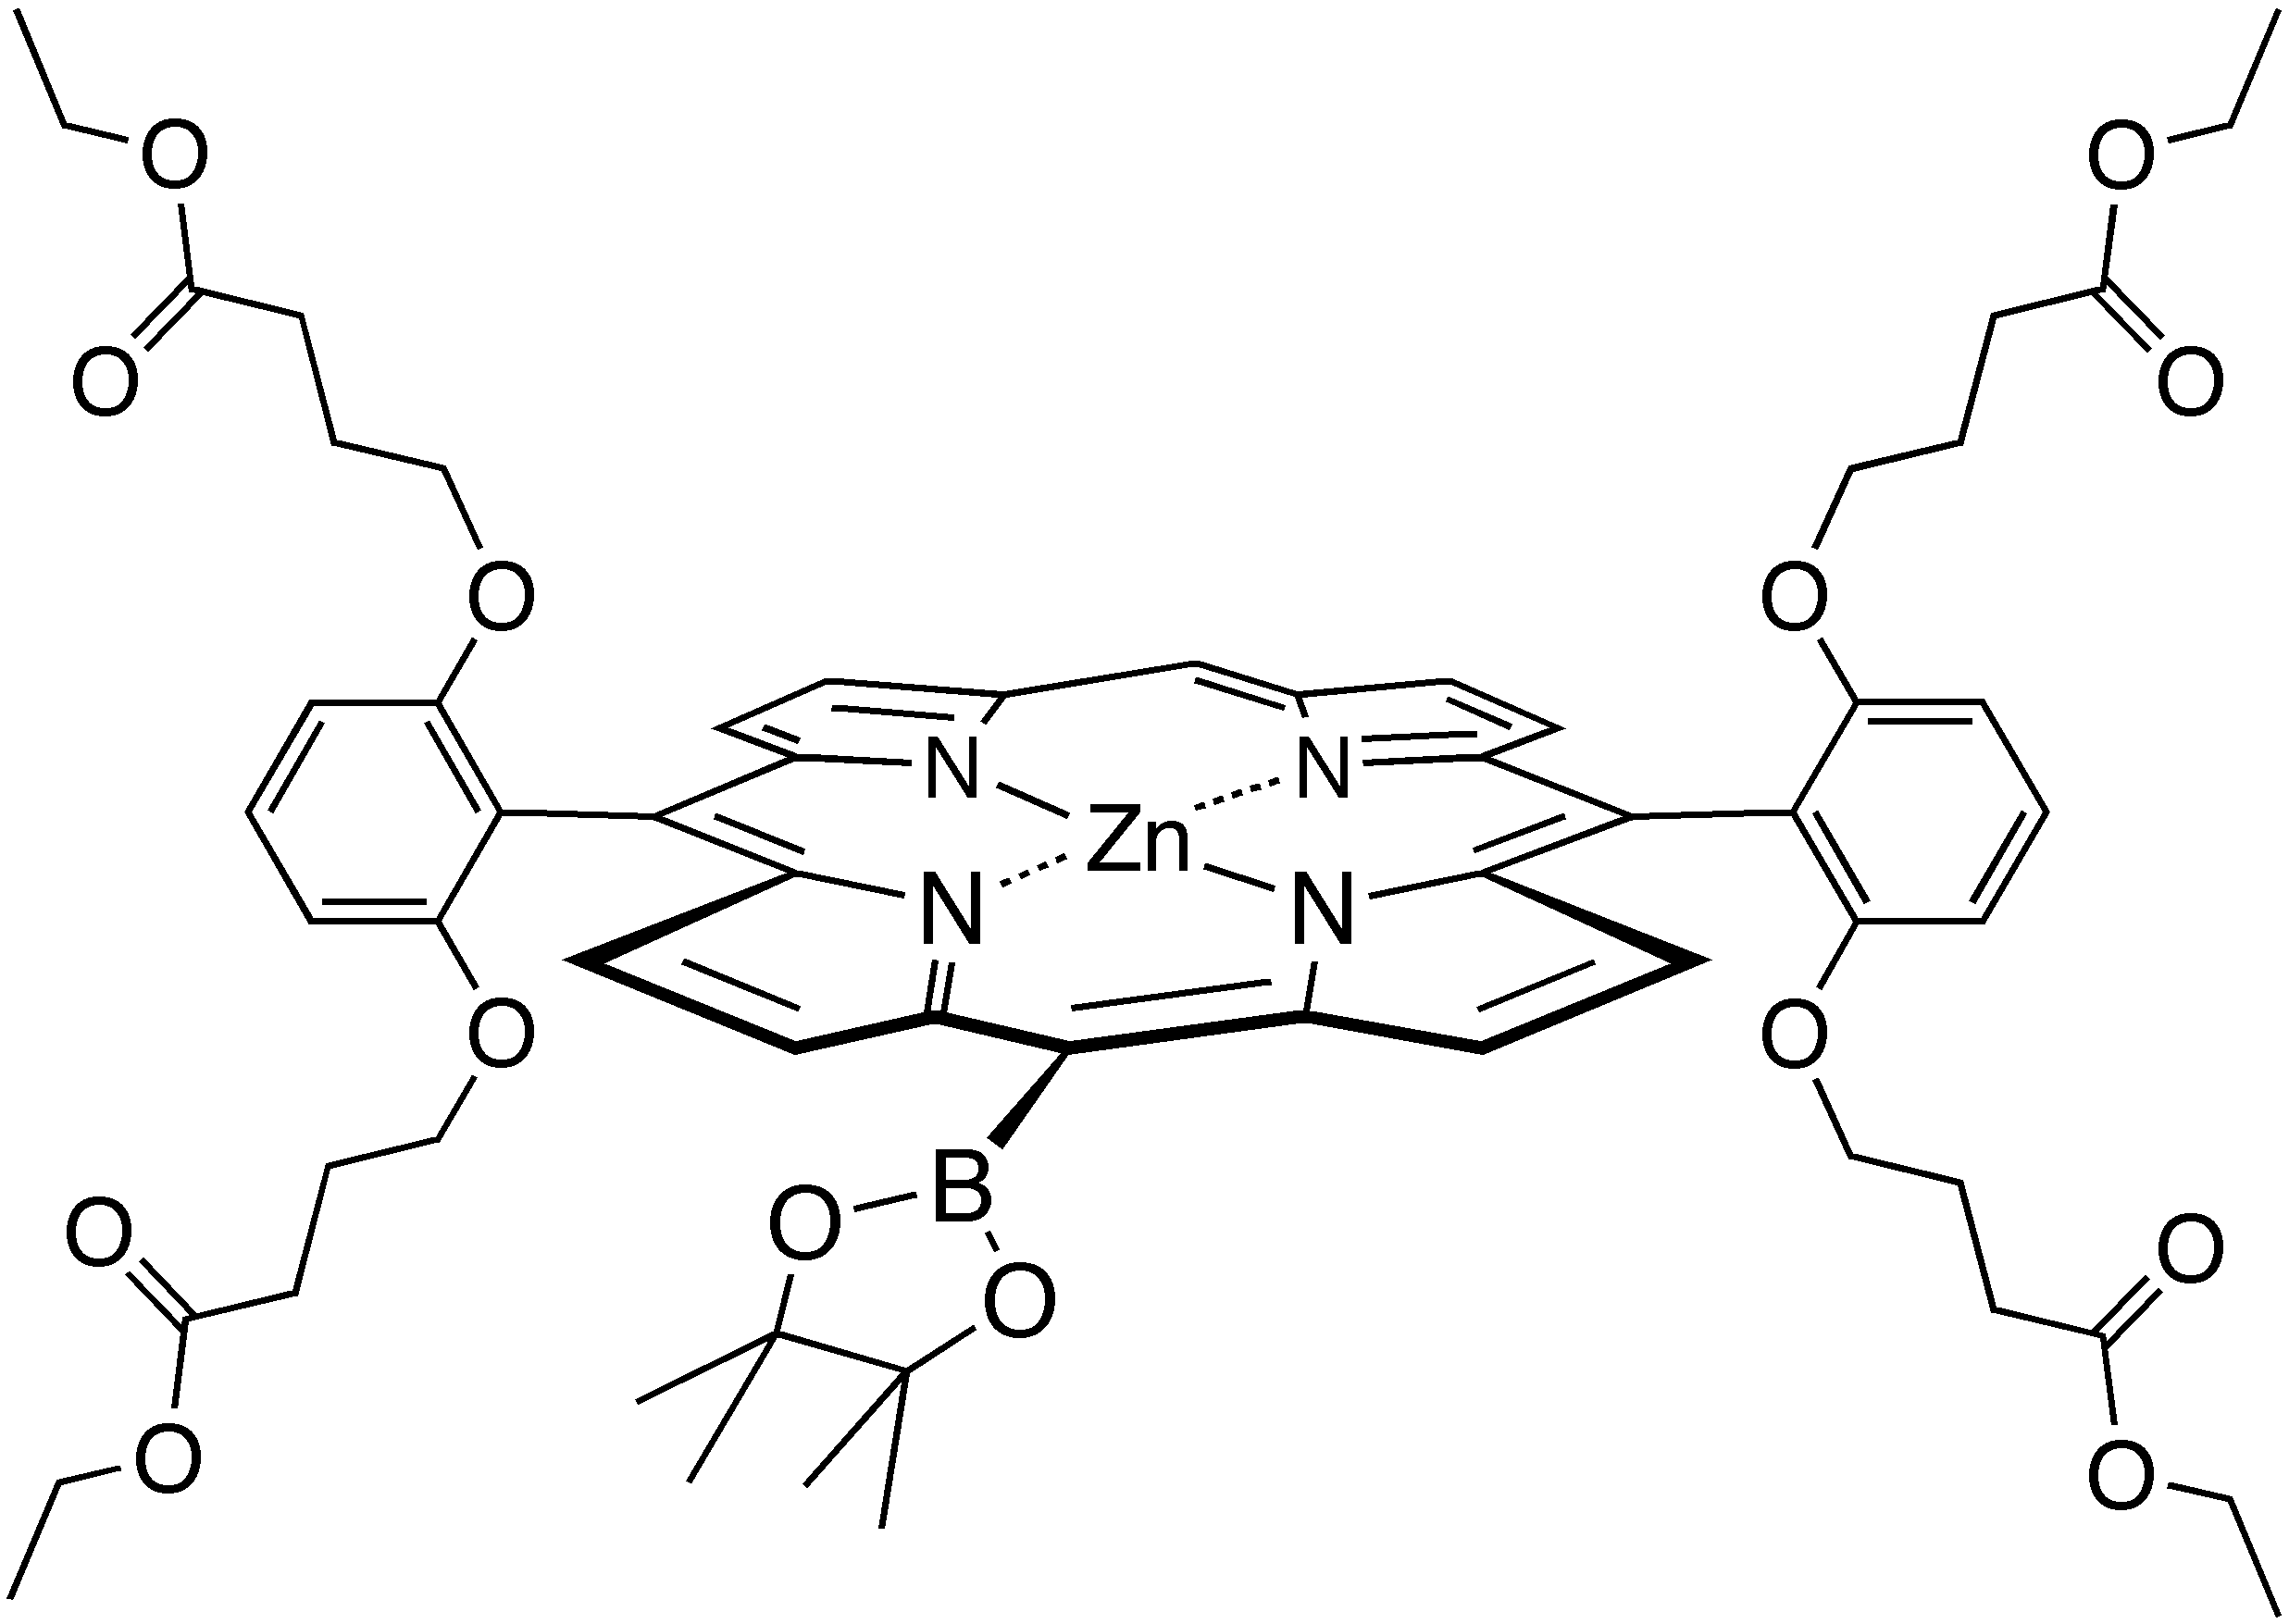


To a degassed solution of 150 mg 3 (133 mol, 1 eq.), 164 l 4,4,5,5-tetramethyl-1,3,2-dioxaborolane (145 mg, 1.31 mmol, 8.5 eq.) and 241 l NEt**3** (175 mg, 1.73 mmol. 13 eq.) in 13.5 ml abs. 1,2-dichloroethane, 3 mg [PdCl**2**(PPh**3**)**2**] (4 mol, 3 mol-%) were added. The solution was refluxed under Ar for 18 h. The reaction was cooled to r.t. and diluted with 20 ml Et**2**O and 15 ml sat. aq. NaH**2**PO**4** solution. The organic layer was washed with 15 ml H**2**O and 15 ml sat. aq. NaCl solution. The solvent was removed and the remaining oil filtered through silica gel (solvent Et**2**O). Recrystallisation afforded 156 mg (quant.) 5.

Pink crystals; mp 117-118 ºC (found: C, 63.4; H, 6.2; N, 5.0. C62H71BN4O14Zn requires C, 63.5; H, 6.1; N, 4.8%); **max (PhMe)/nm 317 (**/dm3 mol-1 cm-1 23 200), 403sh (42 800), 423 (574 300), 517 (2 900), 554 (18 800) and 583sh (2 600); *v*max(CCl4)/cm-1 2980w, 2876w, 1733s (C=O), 1585m, 1524m, 1456s, 1379m, 1306m, 1248m, 1179s, 1145m, 1103s, 1059m, 996m and 857m; **H(500 MHz; CDCl3) 10.15 (1 H, s), 9.83 (2 H, d, *J* 4.6), 9.30 (2 H, d, *J* 4.4), 9.00 (2 H, d), 8.95 (2 H, d, *J* 4.4), 7.71 (2 H, t, *J* 8.5), 7.05 (4 H, d, *J* 8.5), 3.88-3.83 (8 H, m), 3.31-3.26 (8 H, m), 1.83 (12 H, s), 1.21-1.14 (8 H, m), 0.99-0.95 (8 H, m) and 0.60 (12 H, t, *J* 7.1); **C(75 MHz; CDCl3) 172.8, 160.0, 153.9, 150.7, 150.3, 148.7, 132.8, 131.8, 131.6, 131.0, 129.9, 122.6, 112.1, 106.6, 106.3, 84.9, 67.9, 59.4, 29.2, 25.2, 23.7 and 13.4, 1 signal is lacking; *m*/*z* (HR-MALDI-MS, 2-[(2*E*)-3-(4-*tert*-Butylphenyl)-2-methylprop-2-enyliden]malononitrile (DCTB)) 1169.437 (*M*+, C62H71BN4O14Zn requires 1169.438).


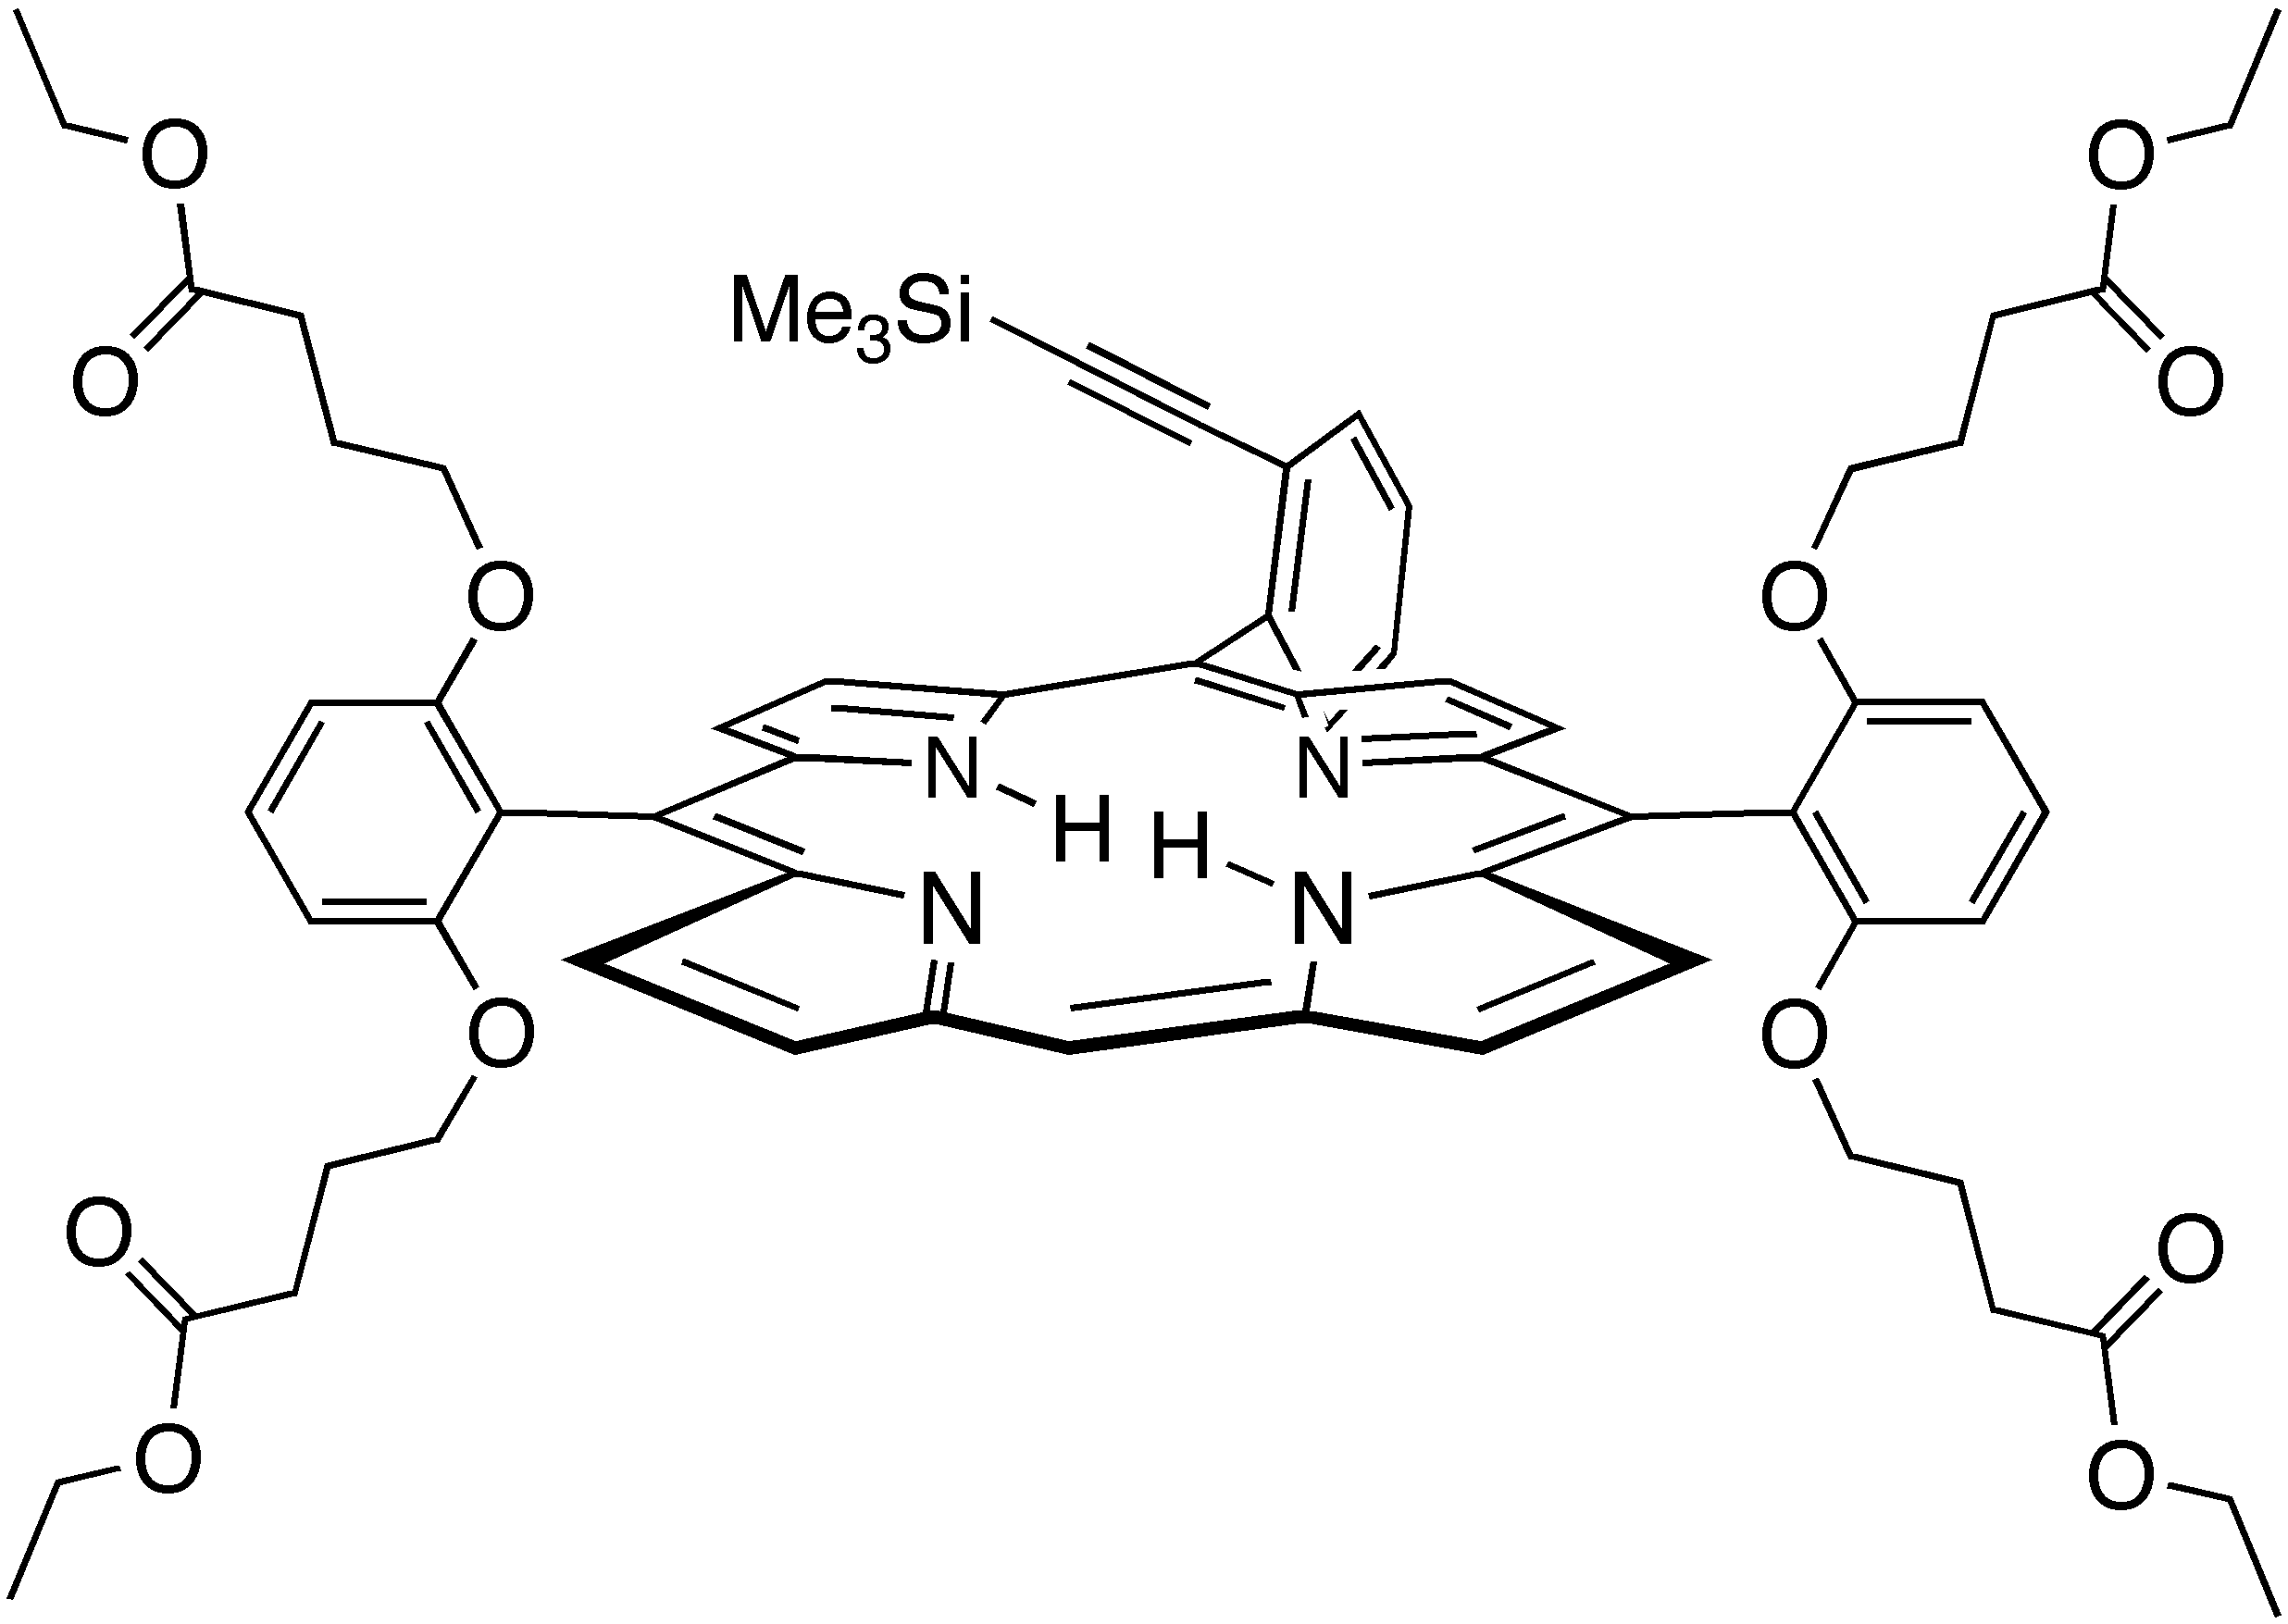
(*SP*-4-2)-{5,15-Bis[2,6-bis(4-ethoxy-4-oxobutoxy)phenyl]-10-[2-(trimethylsilyl)ethynylphenyl]-porphyrinato(2–)-*N***21**,*N***22**,*N***23**,*N***24**}zinc(II) (1).

Trifluoroacetic acid (1.21 ml) was slowly added to a solution of 731 mg 12 (5.07 mmol, 1 eq.), 3.23 g 13 (10.1 mmol, 2 eq.) and 5.58 g 14 (15.2 mmol, 3 eq.) under N**2** in 3 l CH**2**Cl**2**. The reaction was stirred 16 h at r.t., and 5.0 g *p*-chloranil (15.2 mmol, 3 eq.) were subsequently added. The solution was heated to reflux for 2 h and the solvent removed. The residual black oil was filtered through silica (CH**2**Cl**2**/EtOAc 9:1) and the pink fraction was isolated. Further purification by column chromatography (SiO2; CHCl**3**/EtOAc 97:3) afforded 1 (17%) as a highly viscous pink oil.

Pink viscous oil (found: C, 69.7; H, 6.5; N, 4.9. C67H74N4O12Si requires C, 69.6; H, 6.3; N, 4.9%); **max (PhMe)/nm 370 (**/dm3 mol-1 cm-1 22 500), 398sh (79 900), 415 (370 800), 508 (18 800), 540 (4 200), 585 (5 600) and 641 (11 000); *v*max(CCl4)/cm-1 3315w (H-N), 2980w (C-H), 2959w (CH3), 2940w (CH2), 2876w (CH3), 2161w (CC), 1734s (C=O), 1587m, 1457s, 1373m, 1263s, 1249m, 1180m, 1104s, 965w, 957w, 860w and 846w; **H(500 MHz; CDCl3) 10.08 (1 H, s), 9.23 (2 H, d, *J* 4.5), 8.90 (2 H, d, *J* 4.5), 8.78 (2 H, d, *J* 4.7), 8.69 (2 H, d, *J* 4.7), 8.08 (1 H, dd, *J* 7.5, 1.0), 7.88 (1 H, dd, *J* 7.9, 1.2), 7.72-7.69 (1 H, m), 7.70 (2 H, t, *J* 8.5), 7.64 (1 H, dt, *J* 7.5, 1.2), 7.03 (2 H, dd, *J* 8.5, 0.6), 7.00 (2 H, dd, *J* 8.5, 0.6), 3.96-3.85 (4 H, m), 3.87 (4 H, t, *J* 5.8), 3.70 (4 H, dq, *J* 7.1, 2.0), 3.62 (4 H, dq, *J* 7.1, 2.0), 1.52-1.23 (16 H, m), 0.84 (6 H, t, *J* 7.1), 0.79 (6 H, t, *J* 7.1), -1.17 (9 H, s), -2.84 (2 H, br s); **C(125 MHz; CDCl3) 172.9 (2 ), 159.8, 159.6, 145.7, 144.7-147.8 (br, 4 ), 134.9, 131.0-129.8 (br, 4 ), 131.1, 130.1, 127.7, 126.9, 126.5, 120.3, 117.3, 111.5, 105.4, 105.3 (br, 2 ), 104.0, 99.2, 67.3 (2 ), 59.8, 59.7, 29.6 (2  t), 23.8, 23.7, 13.8, 13.8 and –1.4; *m*/*z* (HR-MALDI-MS, DCTB) 1193.485 ([*M* + K]+); 1177.508 ([*M* + Na]+); 1155.515 (*M*H+, C67H75N4O12Si requires 1155.515).

Supplementary Material: EPR spectra

Beatrice Felber*a*, Carlos Calle*b*, Paul Seiler*a*, Arthur Schweiger*b* and François Diederich*a*

a Laboratorium für Organische Chemie, ETH-Hönggerberg, HCI, CH-8093 Zürich, Switzerland.

b Laboratorium für Physikalische Chemie, ETH-Hönggerberg, HCI, CH-8093 Zürich, Switzerland.

In this supplementary material the CW EPR spectra of [**22**.CoII.dmim] and its oxygenated complex are shown and some preliminary EPR parameters are given.

Sample Preparation and Experimental Details

The dendritic cobalt(II) porphyrin [**22**.CoII.dmim] was dissolved in toluene (Fluka, puriss., dried over molecular sieves) under an inert atmosphere. The final concentration was about 2 mM. The solution was transferred to an EPR tube which was sealed after evacuation (10-6 hPa). In order to obtain the oxygenated complex, the sample was exposed to air for 45 minutes.

The X-Band CW spectra were measured on a Bruker ElexSys 500 spectrometer at a microwave frequency of 9.43 GHz using a liquid nitrogen cooling system. The magnetic field was determined by a Bruker ER 035M NMR gaussmeter. The CW EPR spectra were measured at 100 K, with a modulation amplitude 0.2 mT, a modulation frequency of 100 kHz and a microwave power of 6.3 mW.

Data processing was realized in MATLAB (The MathWorks, [http://www.mathworks.com](http://www.mathworks.com/)). The simulations of the CW EPR spectra were performed using the EPR simulation suite EasySpin ([http://www.esr.ethz.ch](http://www.esr.ethz.ch/)).

Results

Figure 1 a shows the low-temperature CW EPR spectrum of the non-oxygenated complex [**22**.CoII.dmim].

**Fig. 1** Experimental (a) and simulated (b) X-Band CW EPR spectra of [**22**.CoII.dmim].

This spectrum is typical for a low-spin cobalt(II) complex with axial ligation to a nitrogen base1. Preliminary values obtained by simulation: *g* = 2.031, *g* = 2.323, cobalt hyperfine values *A* = 232 MHz, *A*< 30 MHz.

After the exposure of the solution to air during 45 min at room temperature, the low-temperature CW EPR spectrum changes to a typical spectrum of an oxygenated cobalt(II) complex shown in Figure 2 a.

**Fig. 2** Experimental (a) and simulated (b) X-Band CW EPR spectra of oxygenated [**22**.CoII.dmim].

Preliminary simulation parameters: *g*1 = 2.0029(0.003), *g*2 = 1.987(0.002), *g*3 = 2.0737(0.001), and cobalt hyperfine values *A*1 = ‑58.0(2.0) MHz, *A*2 = ‑25.0(2.5) MHz, *A*3 = ‑24.0(2.5) MHz, ** = 70(10)°.

Here ** is the angle between *g*3 and *A*3. The above parameters are comparable to those reported earlier for similar complexes2.

References

1. S. Van Doorslaer, R. Bachmann and A. Schweiger, *J. Phys. Chem. A*, 1999, **103**, 5446.
2. S. Van Doorslaer, A. Zingg, A. Schweiger and F. Diederich, *ChemPhysChem*, 2002, **3**, 659.
